# Supplementary material for: A green metal–organic framework to monitor water contaminants
Source: Royal Society of Chemistry journal article supplement (doi:10.1039/c8ra05862h), 2018-01-01
Supplement: c8ra05862h1.pdf [file c8ra05862h1.pdf]

## Supplementary Material

### A green metal-organic framework to monitor water contaminants

**Priscilla Rocío-Bautista<sup>a</sup>, Verónica Pino<sup>a,\*</sup>, Juan H. Ayala<sup>a</sup>, Catalina Ruiz-Pérez<sup>b</sup>,  
Oriol Vallcorbá<sup>c</sup>. Ana M. Afonso<sup>a</sup>, Jorge Pasán<sup>b,\*</sup>**

*<sup>a</sup>Departament of Chemistry, Analytical Chemistry Division, University of La Laguna,  
Tenerife, 38206 Spain*

*<sup>b</sup>Laboratorio de Rayos X y Materiales Moleculares (MATMOL), Physics Department,  
University of La Laguna, Tenerife, 38206 Spain*

*<sup>c</sup>ALBA Synchrotron, Cerdanyola del Valles, Barcelona, 28003, Spain.*

#### Table of contents

|                |          |
|----------------|----------|
| Figure S1..... | page S1  |
| Figure S2..... | page S2  |
| Figure S3..... | page S3  |
| Figure S4..... | page S4  |
| Figure S5..... | page S5  |
| <br>           |          |
| Table S1.....  | page S6  |
| Table S2.....  | page S9  |
| Table S3.....  | page S10 |
| Table S4.....  | page S11 |
| Table S5.....  | page S12 |

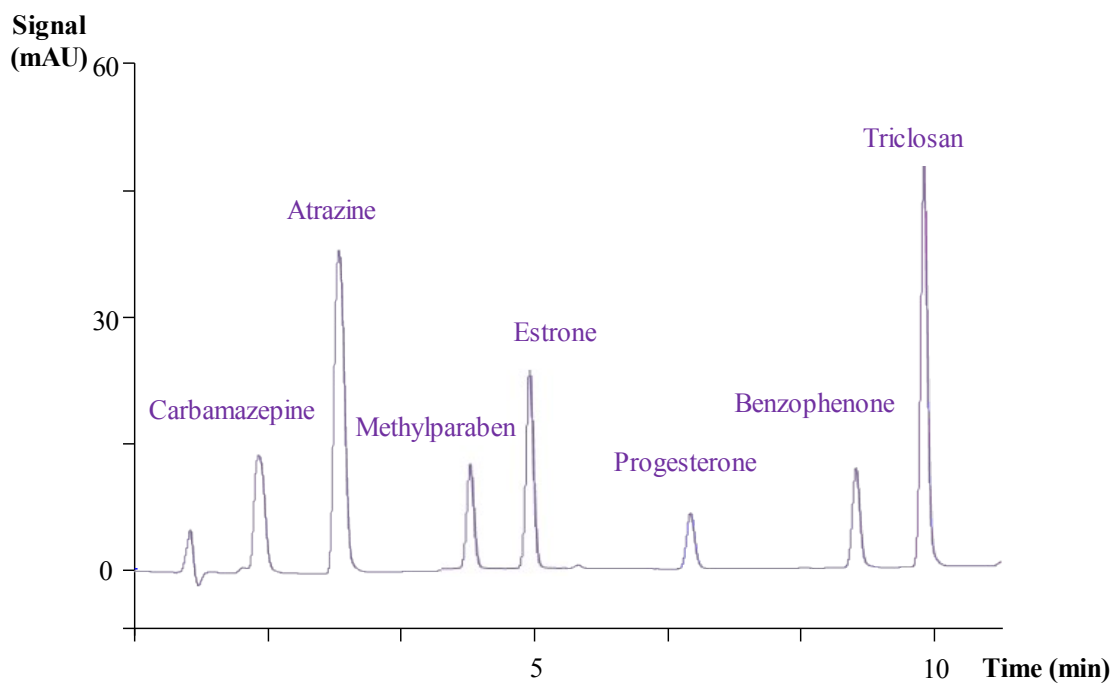

**Figure S1.** Representative chromatogram of the separation of seven target emerging pollutants. The concentration level of the standard is  $100 \mu\text{g}\cdot\text{L}^{-1}$  (in ACN). The UV-Vis detector was set at 220 nm. The UHPLC-UV-Vis separation required a binary mobile phase ACN:water at  $0.4 \text{ mL}\cdot\text{min}^{-1}$  flow rate with the following gradient: initially 40% of ACN, increasing linearly this percentage up to 85% in 20 min. Remaining conditions as described in the experimental section.

S

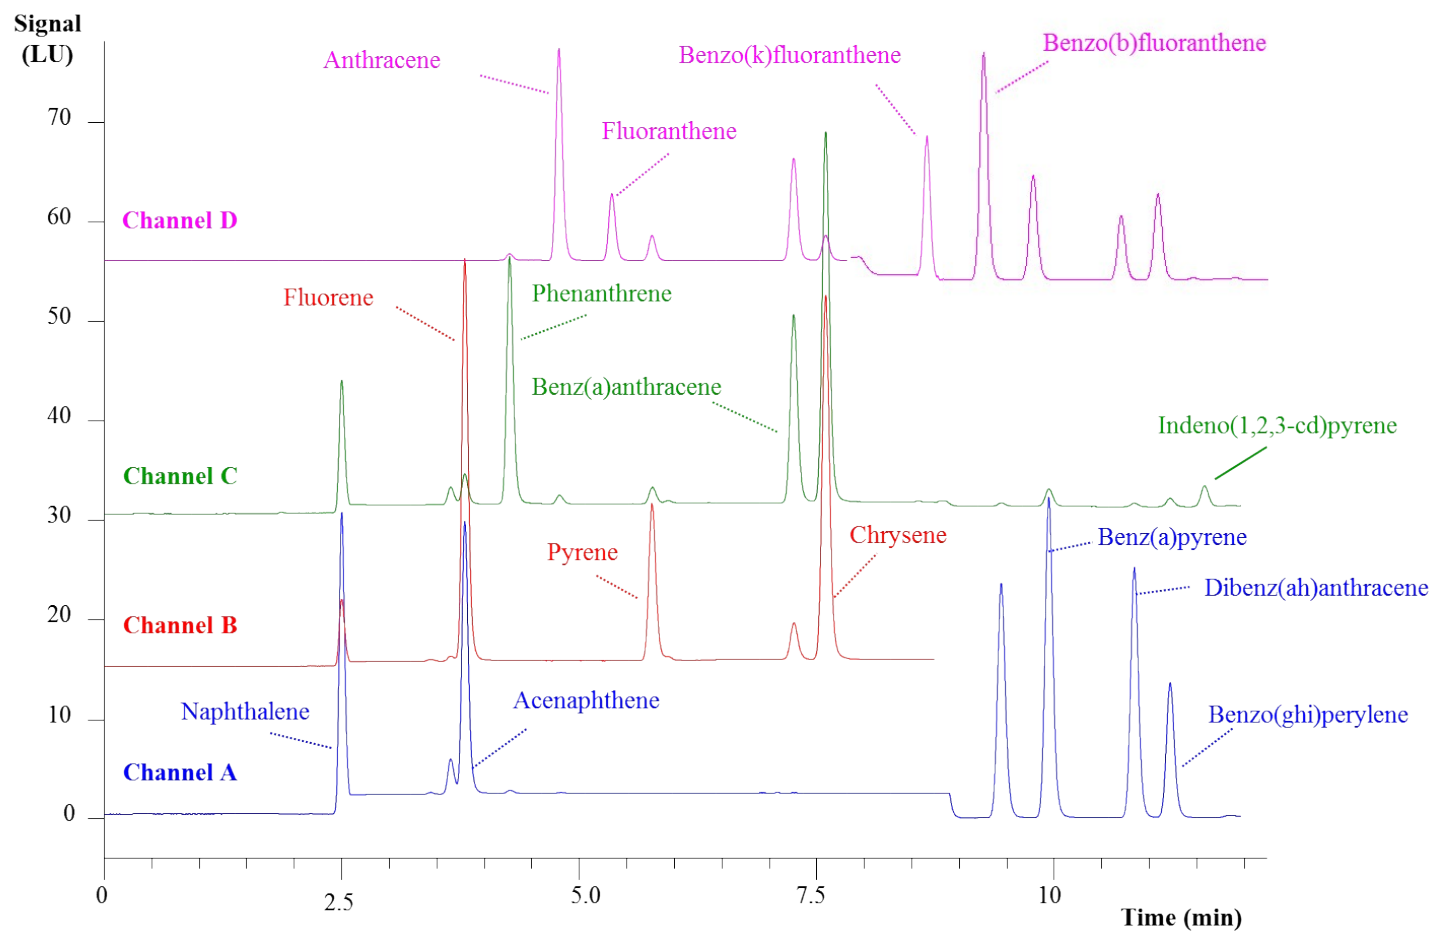

**Figure S2.** Representative chromatogram of the separation of PAHs by UHPLC-FD, with the wavelength program included in Table S2. The concentration level of the standard is  $20 \mu\text{g}\cdot\text{L}^{-1}$  (in ACN). The UHPLC-FD separation required a binary mobile phase ACN:water at  $1 \text{ mL}\cdot\text{min}^{-1}$  flow rate: initially 50% of ACN, and increasing up to 100% of ACN in 11 min, keeping these conditions for 5 min.

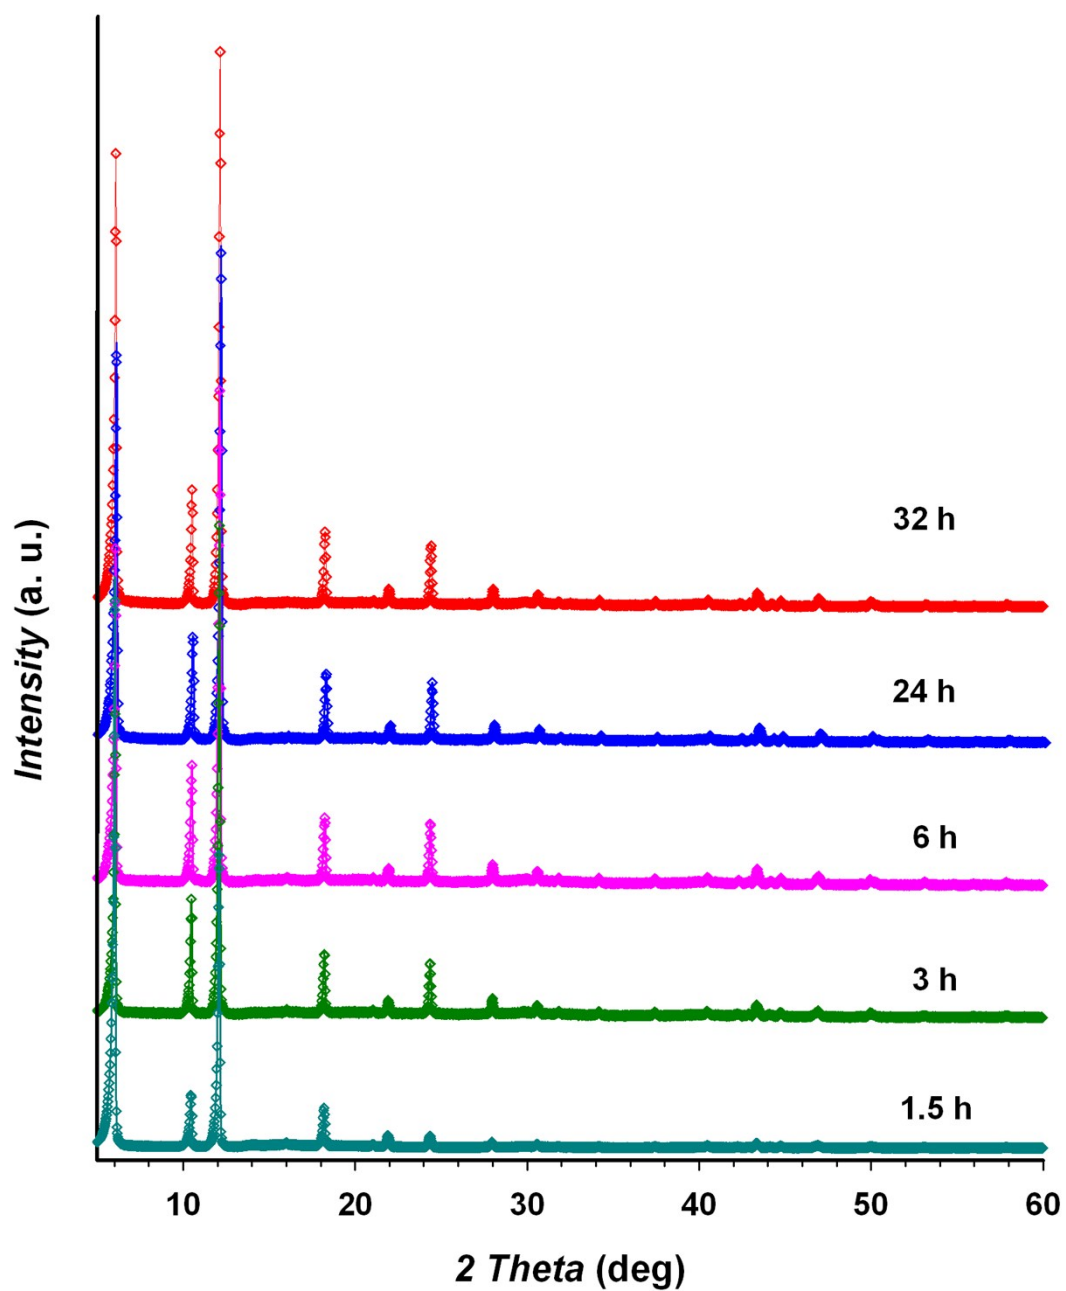

**Figure S3.** Powder X-ray diffraction patterns collected at the lab diffractometer ( $\lambda = 1.5418 \text{ \AA}$ ) in the  $5\text{-}80^\circ$  angular range of the as synthesized products at different reaction times, following the procedure described in the Experimental Section.

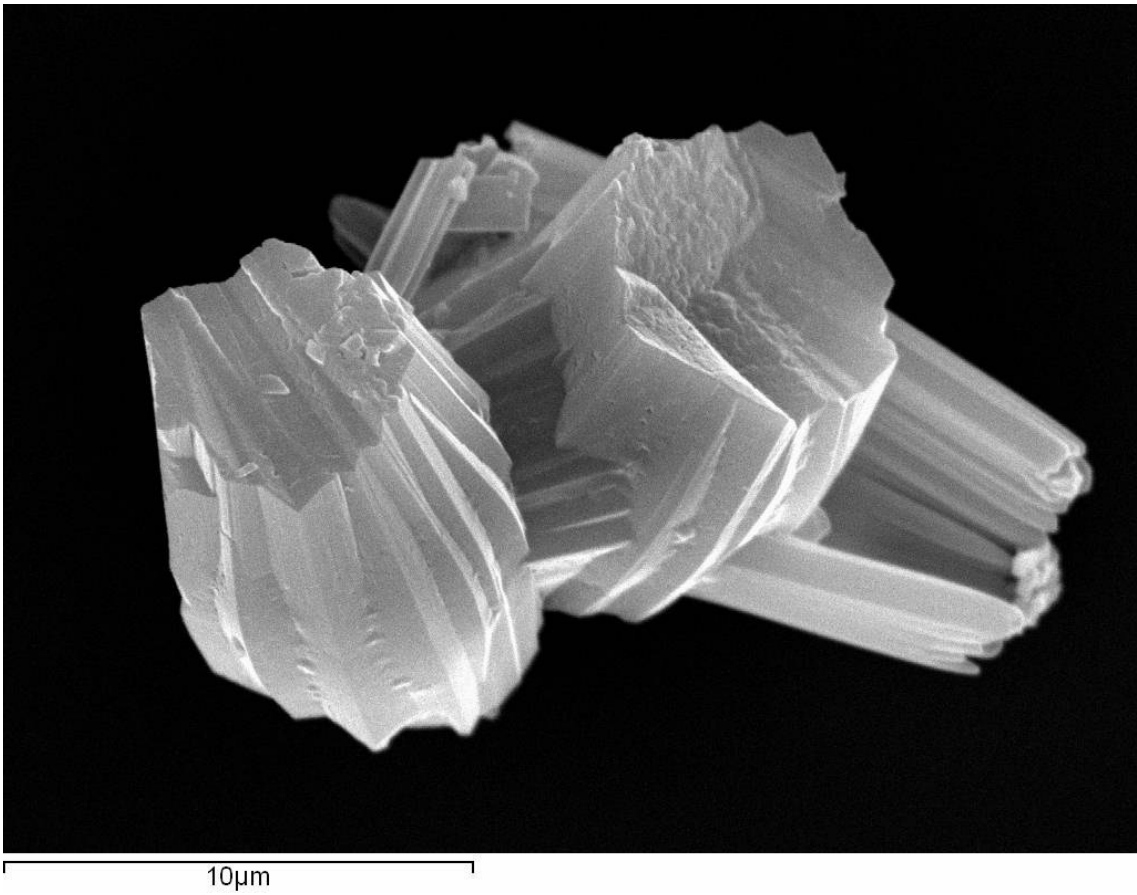

**Figure S4.** Scanning Electron Microscopy image of the CIM-80 crystallites.

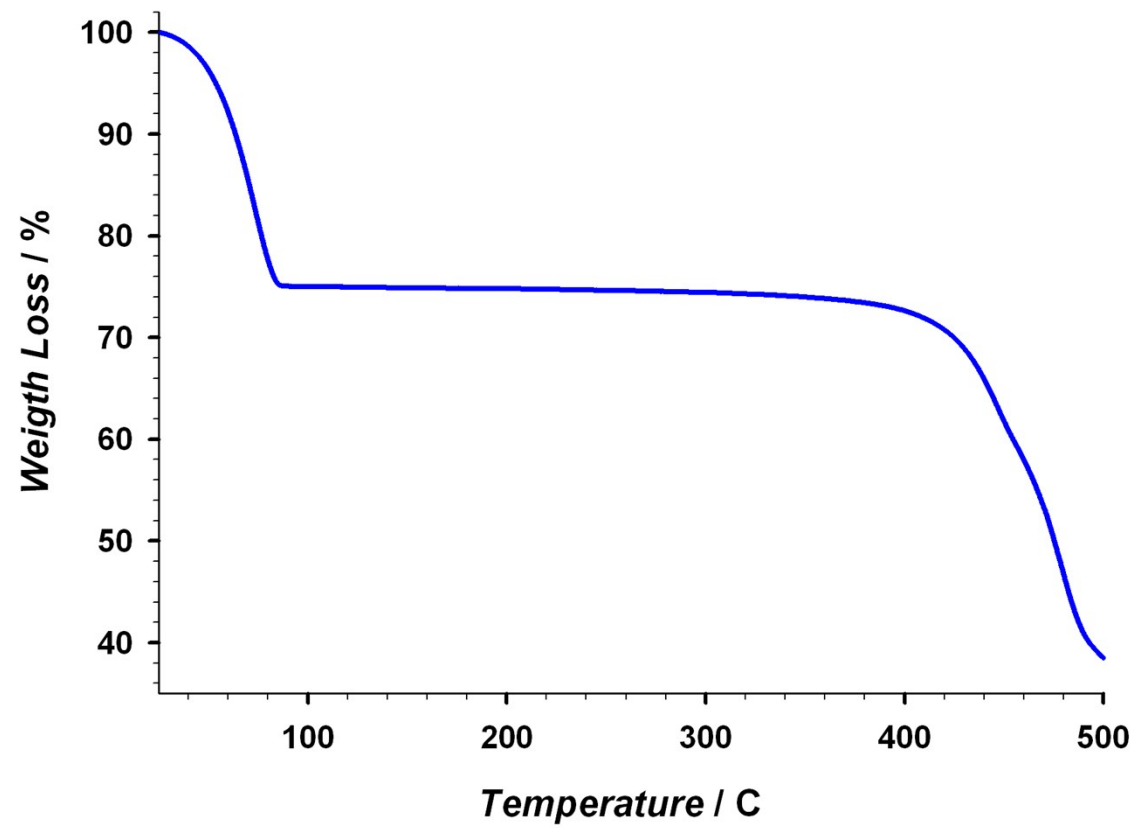

**Figure S5.** TG/DTA analysis of CIM-80.

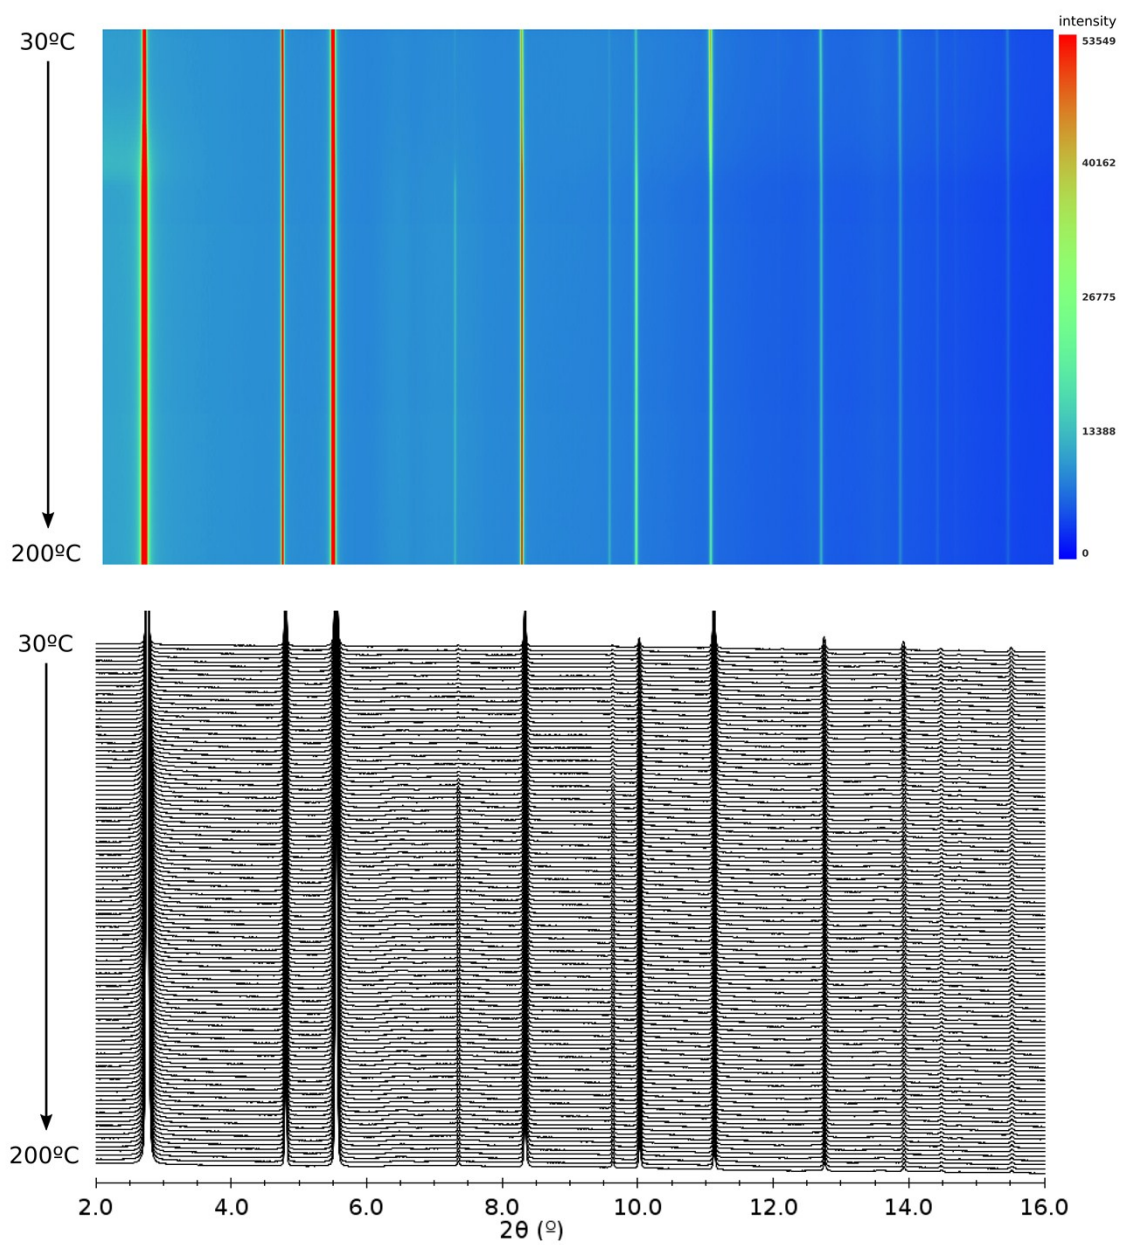

**Figure S6.** Thermodiffractogram of CIM-80 from 30 to 200 °C performed at BL04-MSPD beamline at ALBA synchrotron with  $\lambda = 0.70815$ .

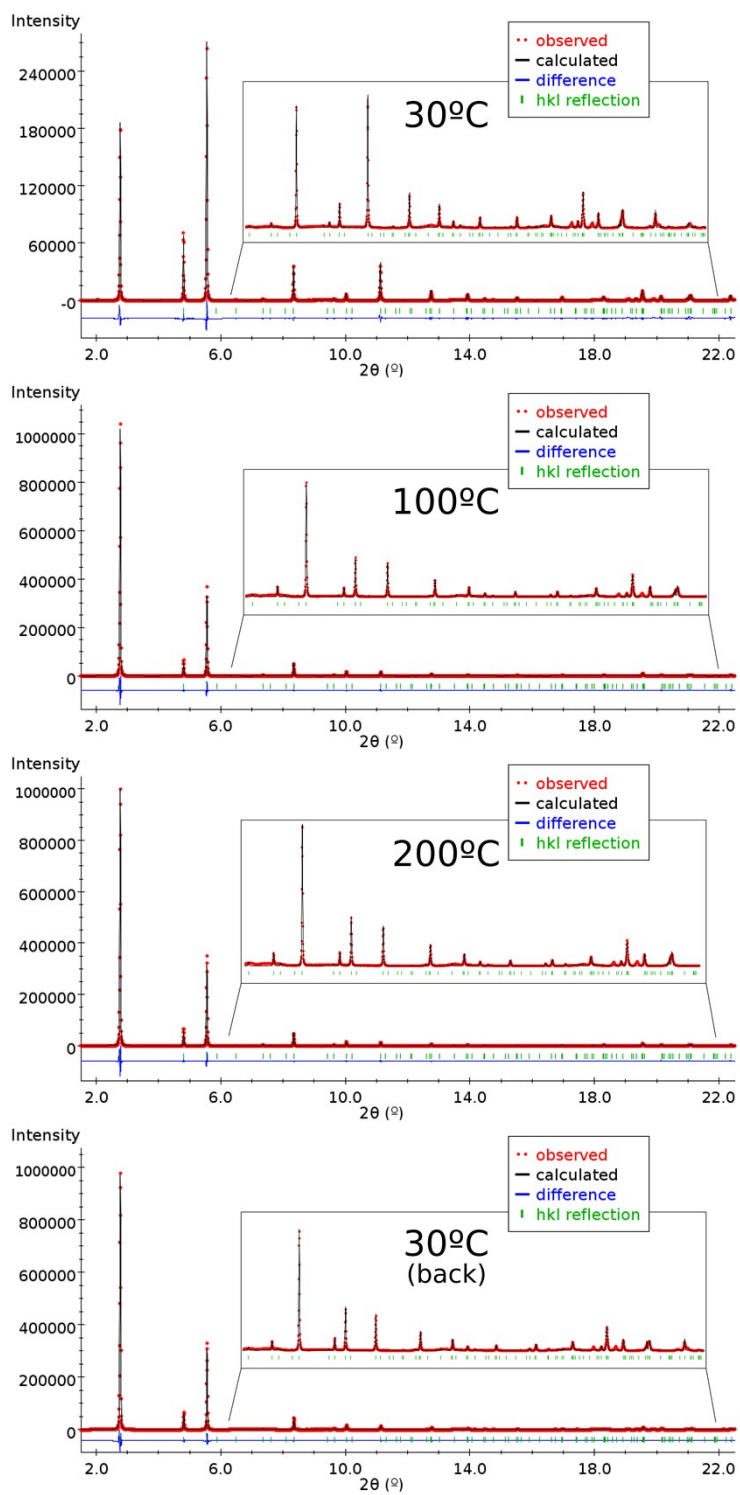

**Figure S7.** Profile matching of the powder diffraction patterns at selected temperatures.



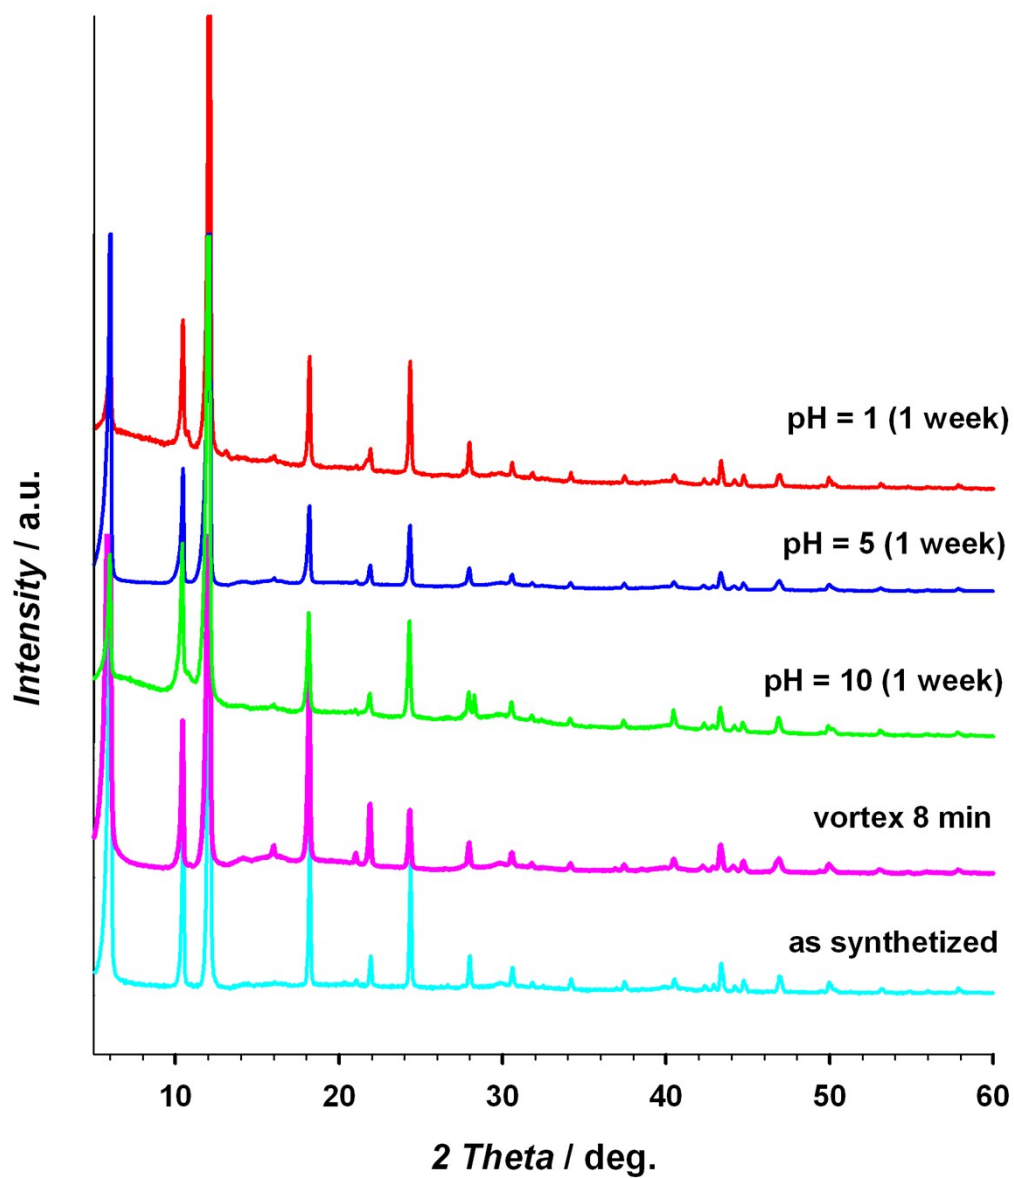

**Figure S8.** Diffraction patterns of CIM-80 after different stability tests, immersion in water at various pH values and application of vortex.

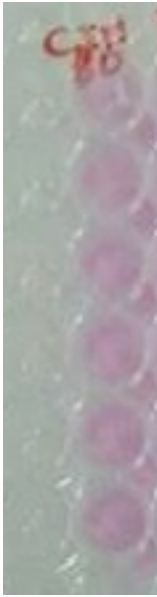

**Figure S9.** Images of the incubated cells in contact with the different tested concentrations of the MOF and the Alamar Blue reagent. Blue color indicates the lysis of the cells (none in this case), while pink color indicates the cells have not suffered any damage when they are put in contact with the MOF.

The cytotoxicity of the CIM-80 was evaluated using the Alamar Blue® cell viability assay as it was previously described [PLoS One. 2017;12:e0183795]. Briefly, the cell lines were put in contact with the MOF at different concentrations, ranging from 0.03 to 2 mg·mL<sup>-1</sup>, and incubated in 96-well plates for 24 h. Subsequently, the plates were analyzed by the microplate reader using a test wavelength of 570 nm and a reference wavelength of 630 nm. Dose response curves were plotted, and the 50% cytotoxic concentration (CC50) concentrations were calculated by linear regression analysis with 95% confidence limits. All experiments were performed two times each one, and the mean values were also calculated.

The Alamar Blue Assay Reagent® was provided by Biosource (Europe, Nivelles, Belgium) and the J774.1 murine macrophage cell line by ATCCTIB-67 (American Type Culture Collection LG Promochem, Spain).

A Tali® image cytometer (Thermo Fisher Scientific, Waltham, Massachusetts, USA) and an EnSpire® Multimode Plate Reader (Perkin Elmer, Madrid, Spain) were used.

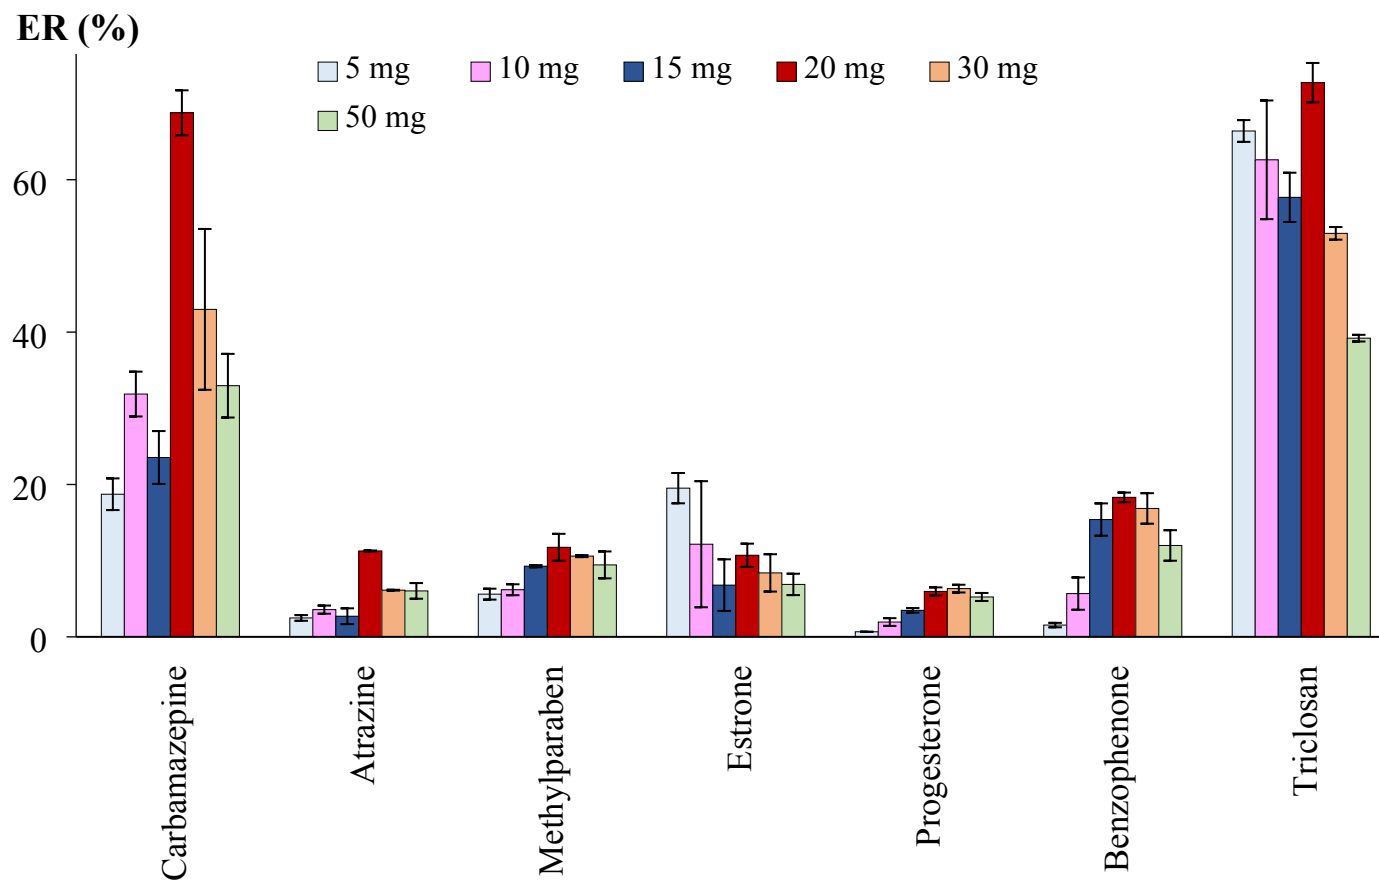

**Figure S10.** Influence of the amount of MOF CIM-80 in the entire extraction efficiency of the method for the group of emerging contaminants. Experiments were carried out by triplicate: 10 mL of water are mixed with 20 mg of CIM-80, then subjected to vortex stirring during 3 min. The supernatant aqueous phase is removed by centrifugation and decantation. Afterwards, 500  $\mu$ L of ACN are added to the MOF remaining in the tube (and containing the trapped contaminants). Vortex is then applied for 3 min, followed again by centrifugation.

**Table S1.** Several characteristics of the group of analytes studied.

| Analyte       | Structure                                                                           | Molecular weight (g·mol <sup>-1</sup> ) | Volume <sup>a</sup> (Å <sup>3</sup> ) | Water solub. <sup>a</sup> (mg·L <sup>-1</sup> ) at 25 °C | LogK <sub>OW</sub> <sup>a</sup> | pK <sub>a</sub> <sup>a</sup> | Vapor press. <sup>a</sup> at 25 °C (atm) |
|---------------|-------------------------------------------------------------------------------------|-----------------------------------------|---------------------------------------|----------------------------------------------------------|---------------------------------|------------------------------|------------------------------------------|
| Carbamazepine | 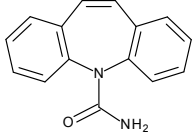   | 236.27                                  | 210.32                                | 18                                                       | 2.45                            | 13.9                         | 7.6×10 <sup>-10</sup>                    |
| Atrazine      |    | 215.68                                  | 190.90                                | 35 (26 °C)                                               | 2.61                            | 2.27                         | 1.7×10 <sup>-8</sup>                     |
| Methylparaben |    | 152.10                                  | 208.90                                | 2.5×10 <sup>-3</sup>                                     | 1.96                            | 8.50                         | 3.15×10 <sup>-7</sup>                    |
| Estrone       |    | 270.37                                  | 263.17                                | 30                                                       | 3.13                            | 10.3                         | 2.0×10 <sup>-11</sup>                    |
| Progesterone  |   | 314.46                                  | 321.10                                | 8.8                                                      | 3.87                            | -                            | 4.5×10 <sup>-11</sup>                    |
| Benzophenone  |  | 182.20                                  | 278.10                                | 137                                                      | 3.18                            | 11.3                         | 2.5×10 <sup>-6</sup>                     |

|                   |                                                                                     |        |        |                     |      |      |                      |
|-------------------|-------------------------------------------------------------------------------------|--------|--------|---------------------|------|------|----------------------|
| Triclosan         | 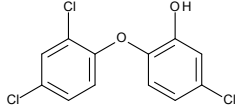   | 289.54 | 212.05 | 10 (20 °C)          | 4.76 | 7.80 | $4.3 \cdot 10^{-8}$  |
| Naphthalene       |    | 128.17 | 205.10 | 31                  | 3.30 | -    | $1.0 \cdot 10^{-4}$  |
| Acenaphthene      |    | 152.20 | 212.90 | 3.9                 | 4.07 | -    | $1.2 \cdot 10^{-6}$  |
| Fluorene          |    | 166.22 | 243.30 | 1.7                 | 4.18 | -    | $7.9 \cdot 10^{-7}$  |
| Phenanthrene      |    | 178.23 | 261.90 | 1.1                 | 4.46 | -    | $1.6 \cdot 10^{-7}$  |
| Anthracene        |    | 178.23 | 261.90 | 0.040               | 4.45 | -    | $1.0 \cdot 10^{-4}$  |
| Fluoranthene      |   | 202.26 | 269.00 | 0.23                | 5.16 | -    | $1.2 \cdot 10^{-8}$  |
| Pyrene            |  | 202.26 | 269.00 | 0.14                | 4.88 | -    | $5 \cdot 10^{-10}$   |
| Benz(a)anthracene |  | 228.29 | 318.50 | $9.1 \cdot 10^{-3}$ | 5.79 | -    | $2.78 \cdot 10^{-7}$ |

|                        |                                                                                     |        |        |                      |      |   |                       |
|------------------------|-------------------------------------------------------------------------------------|--------|--------|----------------------|------|---|-----------------------|
| Chrysene               | 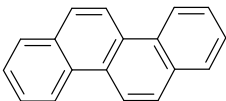   | 228.29 | 318.50 | $2.0 \times 10^{-3}$ | 5.73 | - | $8.2 \cdot 10^{-12}$  |
| Benzo(b)fluoranthene   |    | 252.32 | 325.60 | $1.5 \times 10^{-3}$ | 6.60 | - | $6.6 \cdot 10^{-10}$  |
| Benz(a)pyrene          |    | 252.32 | 325.60 | $1.6 \times 10^{-3}$ | 6.13 | - | $7.2 \cdot 10^{-12}$  |
| Dibenz(a,h)anthracene  |    | 278.35 | 375.10 | $2.5 \times 10^{-3}$ | 6.50 | - | $1.35 \cdot 10^{-12}$ |
| Benzo(ghi)perilene     |    | 276.34 | 332.70 | $2.6 \times 10^{-4}$ | 6.63 | - | $1 \cdot 10^{-13}$    |
| Benzo(k)fluoranthene   |  | 252.32 | -      | $8.0 \times 10^{-4}$ | 6.11 | - | $1.23 \cdot 10^{-12}$ |
| Indeno(1,2,3-cd)pyrene |  | 276.34 | -      | $1.9 \times 10^{-4}$ | 6.70 | - | $1.6 \cdot 10^{-13}$  |

---

<sup>a</sup>Obtained from SciFinder<sup>®</sup> 2018 database

**Table S2.** Wavelength program used in the FD for the UHPLC-FD determination of PAHs, indicating the four emission channels: A, B, C and D.

| PAH                    | $\lambda_{\text{ex max}}^{\text{a}}$ (nm) | $\lambda_{\text{em max}}^{\text{a}}$ (nm) | time <sup>b</sup> (min) | $\lambda_{\text{ex}}$ (nm) | $\lambda_{\text{em}}$ (nm) in A | $\lambda_{\text{em}}$ (nm) in B | $\lambda_{\text{em}}$ (nm) in C | $\lambda_{\text{em}}$ (nm) in D |
|------------------------|-------------------------------------------|-------------------------------------------|-------------------------|----------------------------|---------------------------------|---------------------------------|---------------------------------|---------------------------------|
|                        |                                           |                                           | 0                       | 254                        | 330                             | 312                             | 360                             | 443                             |
|                        |                                           |                                           | 2.0                     | 214                        | 330                             | 312                             | 360                             | 443                             |
| Naphthalene            | 219                                       | 321                                       | 2.5 <sup>c</sup>        | 214                        | 330                             | 312                             | 360                             | 443                             |
|                        |                                           |                                           | 2.6                     | 254                        | 330                             | 312                             | 360                             | 443                             |
| Acenaphthene           | 225                                       | 335                                       | 3.6 <sup>c</sup>        | 254                        | 330                             | 312                             | 360                             | 443                             |
| Fluorene               | 262                                       | 311                                       | 3.8 <sup>c</sup>        | 254                        | 330                             | 312                             | 360                             | 443                             |
| Phenanthrene           | 250                                       | 363                                       | 4.3 <sup>c</sup>        | 254                        | 330                             | 312                             | 360                             | 443                             |
| Anthracene             | 250                                       | 424                                       | 4.8 <sup>c</sup>        | 254                        | 330                             | 312                             | 360                             | 443                             |
|                        |                                           |                                           | 5.2                     | 280                        | 330                             | 312                             | 360                             | 443                             |
|                        |                                           |                                           | 5.3                     | 280                        | 330                             | 375                             | 360                             | 443                             |
| Fluoranthene           | 286                                       | 455                                       | 5.4 <sup>c</sup>        | 280                        | 330                             | 375                             | 360                             | 443                             |
| Pyrene                 | 273                                       | 371                                       | 5.8 <sup>c</sup>        | 280                        | 330                             | 375                             | 360                             | 443                             |
|                        |                                           |                                           | 6.9                     | 280                        | 330                             | 375                             | 385                             | 443                             |
|                        |                                           |                                           | 7.0                     | 270                        | 330                             | 375                             | 385                             | 443                             |
| Benz(a)anthracene      | 286                                       | 386                                       | 7.4 <sup>c</sup>        | 270                        | 330                             | 375                             | 385                             | 443                             |
| Chrysene               | 266                                       | 385                                       | 7.7 <sup>c</sup>        | 270                        | 330                             | 375                             | 385                             | 443                             |
|                        |                                           |                                           | 8.6                     | 275                        | 330                             | 375                             | 385                             | 443                             |
|                        |                                           |                                           | 8.7                     | 275                        | 406                             | 375                             | 385                             | 443                             |
|                        |                                           |                                           | 8.8                     | 275                        | 406                             | 375                             | 385                             | 451                             |
| Benzo(b)fluoranthene   | 244                                       | 442                                       | 9.0 <sup>c</sup>        | 275                        | 406                             | 375                             | 385                             | 451                             |
| Benzo(k)fluoranthene   | 290                                       | 410                                       | 9.6 <sup>c</sup>        | 275                        | 406                             | 375                             | 385                             | 451                             |
| Benz(a)pyrene          | 284                                       | 405                                       | 10.1 <sup>c</sup>       | 275                        | 406                             | 375                             | 385                             | 451                             |
|                        |                                           |                                           | 10.5                    | 275                        | 406                             | 375                             | 496                             | 451                             |
|                        |                                           |                                           | 10.6                    | 288                        | 406                             | 375                             | 496                             | 451                             |
| Dibenz(a,h)anthracene  | 295                                       | 404                                       | 11 <sup>c</sup>         | 288                        | 406                             | 375                             | 496                             | 451                             |
| Benzo(ghi)perilene     | 272                                       | 470                                       | 11.4 <sup>c</sup>       | 288                        | 406                             | 375                             | 496                             | 451                             |
| Indeno(1,2,3-cd)pyrene | 276                                       | 307                                       | 11.7 <sup>c</sup>       | 288                        | 406                             | 375                             | 496                             | 451                             |

<sup>a</sup>maximum excitation and emission wavelength [Appl. Spectroscopy 51 (1998) 380] <sup>b</sup>only one wavelength can be modified at each time <sup>c</sup>average retention time



**Table S3.** Several quality analytical parameters of the UHPLC-UV method for 7 pollutants subjected study.

| Analyte       | Retention time<br>± SD <sup>a</sup> | Range<br>(µg·L <sup>-1</sup> ) | R      | S <sub>x/y</sub> <sup>b</sup> | Slope ± SD <sup>c</sup> | LOD <sup>d</sup><br>(µg·L <sup>-1</sup> ) | LOQ <sup>e</sup><br>(µg·L <sup>-1</sup> ) | RSD <sup>f</sup> (%) |                      |
|---------------|-------------------------------------|--------------------------------|--------|-------------------------------|-------------------------|-------------------------------------------|-------------------------------------------|----------------------|----------------------|
|               |                                     |                                |        |                               |                         |                                           |                                           | Level 1 <sup>g</sup> | Level 2 <sup>h</sup> |
| Carbamazepine | 1.6 ± 0.3                           | 25 – 1000                      | 0.9994 | 9331.4                        | 910 ± 14                | 1.58                                      | 5.25                                      | 5.7                  | 0.80                 |
| Atrazine      | 2.6 ± 0.1                           | 25 – 1000                      | 0.9998 | 10885                         | 1491 ± 12               | 3.27                                      | 10.9                                      | 3.0                  | 2.0                  |
| Methylparaben | 4.1 ± 0.1                           | 50 – 1000                      | 0.9993 | 3194.1                        | 797 ± 2                 | 11.0                                      | 38.0                                      | 4.2                  | 5.6                  |
| Estrone       | 4.8 ± 0.6                           | 75 – 1500                      | 0.9997 | 4035.2                        | 272 ± 3                 | 14.6                                      | 48.7                                      | 5.4                  | 2.9                  |
| Progesterone  | 7.1 ± 0.5                           | 50 – 1500                      | 0.9998 | 9210.0                        | 767 ± 6                 | 11.9                                      | 39.7                                      | 3.6                  | 2.1                  |
| Benzophenone  | 8.4 ± 0.5                           | 25 – 1000                      | 0.9999 | 2844.0                        | 807 ± 5                 | 2.21                                      | 7.40                                      | 6.8                  | 4.9                  |
| Triclosan     | 9.9 ± 0.6                           | 25 – 1250                      | 0.9999 | 2683.8                        | 569 ± 2                 | 4.46                                      | 14.9                                      | 6.2                  | 3.4                  |

<sup>a</sup>standard deviation (n = 30, inter-day)

<sup>b</sup>standard deviation of the regression (or error of the estimate)

<sup>c</sup>confidence interval for the slope, associated to n = 6 calibration levels

<sup>d</sup>limit of detection

<sup>e</sup>limit of quantification

<sup>f</sup>relative standard deviation, as inter-day precision (n = 6, in 3 non-consecutive days)

<sup>g</sup>concentration level: 50 µg·L<sup>-1</sup>

<sup>h</sup>concentration level: 800 µg·L<sup>-1</sup>

**Table S4.** Several quality analytical parameters of the UHPLC-FD method for the PAHs studied.

| Analyte                | Retention time<br>± SD <sup>a</sup> | Range<br>(µg·L <sup>-1</sup> ) | R     | S <sub>x/y</sub> <sup>b</sup> | Slope ± SD <sup>c</sup> | LOD <sup>d</sup><br>(µg·L <sup>-1</sup> ) | LOQ <sup>e</sup><br>(µg·L <sup>-1</sup> ) | RSD <sup>f</sup> (%) |                      |
|------------------------|-------------------------------------|--------------------------------|-------|-------------------------------|-------------------------|-------------------------------------------|-------------------------------------------|----------------------|----------------------|
|                        |                                     |                                |       |                               |                         |                                           |                                           | Level 1 <sup>g</sup> | Level 2 <sup>h</sup> |
| Naphthalene            | 2.5 ± 0.7                           | 0.5 – 6                        | 0.996 | 0.11                          | 0.61 ± 0.03             | 0.03                                      | 0.1                                       | 4.1                  | 3.6                  |
| Acenaphthene           | 3.6 ± 0.2                           | 0.5 – 7                        | 0.997 | 0.03                          | 0.15 ± 0.01             | 0.06                                      | 0.2                                       | 4.5                  | 2.5                  |
| Fluorene               | 3.8 ± 0.1                           | 0.05 – 5                       | 0.998 | 0.15                          | 1.24 ± 0.03             | 0.006                                     | 0.02                                      | 4.9                  | 1.4                  |
| Phenanthrene           | 4.32 ± 0.01                         | 0.1 – 5                        | 0.999 | 0.02                          | 0.64 ± 0.01             | 0.03                                      | 0.09                                      | 3.1                  | 2.0                  |
| Anthracene             | 4.8 ± 0.1                           | 0.2 – 5                        | 0.998 | 0.07                          | 0.47 ± 0.02             | 0.015                                     | 0.05                                      | 8.0                  | 4.0                  |
| Fluoranthene           | 5.40 ± 0.01                         | 0.2 – 5                        | 0.999 | 0.02                          | 0.15 ± 0.01             | 0.015                                     | 0.05                                      | 3.4                  | 1.8                  |
| Pyrene                 | 5.86 ± 0.01                         | 0.1 – 7                        | 0.999 | 0.04                          | 0.40 ± 0.01             | 0.009                                     | 0.03                                      | 5.6                  | 4.8                  |
| Benz(a)anthracene      | 7.39 ± 0.01                         | 0.1 – 5                        | 0.994 | 0.11                          | 0.46 ± 0.03             | 0.015                                     | 0.05                                      | 1.6                  | 1.7                  |
| Chrysene               | 7.7 ± 0.2                           | 0.05 – 4                       | 0.999 | 0.06                          | 0.85 ± 0.02             | 0.003                                     | 0.01                                      | 5.4                  | 5.0                  |
| Benzo(b)fluoranthene   | 9.0 ± 0.1                           | 0.1 – 5                        | 0.997 | 0.05                          | 0.30 ± 0.01             | 0.009                                     | 0.03                                      | 4.4                  | 6.5                  |
| Benzo(a)pyrene         | 9.6 ± 0.1                           | 0.05 – 5                       | 0.997 | 0.08                          | 0.54 ± 0.02             | 0.003                                     | 0.01                                      | 6.2                  | 5.9                  |
| Dibenz(a,h)anthracene  | 10.12 ± 0.01                        | 0.05 – 5                       | 0.995 | 0.21                          | 0.63 ± 0.05             | 0.003                                     | 0.01                                      | 4.8                  | 3.3                  |
| Benzo(ghi)perilene     | 11.0 ± 0.1                          | 0.05 – 5                       | 0.994 | 0.40                          | 7.25 ± 0.51             | 0.006                                     | 0.02                                      | 6.2                  | 10.9                 |
| Benzo(k)fluoranthene   | 11.4 ± 0.1                          | 0.10 – 5.5                     | 0.998 | 0.04                          | 0.27 ± 0.01             | 0.006                                     | 0.02                                      | 6.5                  | 5.4                  |
| Indeno(1,2,3-cd)pyrene | 11.7 ± 0.1                          | 0.5 – 8                        | 0.999 | 0.01                          | 0.08 ± 0.01             | 0.09                                      | 0.3                                       | 2.5                  | 5.1                  |

<sup>a</sup>standard deviation (n = 30, inter-day)<sup>b</sup>standard deviation of the regression (or error of the estimate)<sup>c</sup>confidence interval for the slope, associated to n = 7 calibration levels<sup>d</sup>limit of detection<sup>e</sup>limit of quantification<sup>f</sup>relative standard deviation, as inter-day precision (n = 6, in 3 non-consecutive days)<sup>g</sup>concentration level: 0.8 µg·L<sup>-1</sup><sup>h</sup>concentration level: 2 µg·L<sup>-1</sup>

**Table S5.** Analytical performance of methods reported in the scientific literature for the determination of similar water contaminants using SPE.

| <b>Contaminant</b>                                                                      | <b>Sorbent (amount)</b>                            | <b>Sample prep.</b>               | <b>LOD (ng·L<sup>-1</sup>)</b>        | <b>Chromatographic method</b> | <b>Reference</b>                           |
|-----------------------------------------------------------------------------------------|----------------------------------------------------|-----------------------------------|---------------------------------------|-------------------------------|--------------------------------------------|
| Carbamazepine, estrone & triclosan                                                      | NVP <sup>a</sup><br>(2.5 mg)                       | BA $\mu$ E <sup>b</sup>           | 5, 100 & 10                           | HPLC-DAD                      | Int. J. Environ. Anal. Chem. 97 (2017) 484 |
| Atrazine                                                                                | MWCNTs <sup>d</sup><br>(100 mg)                    | $\mu$ SPE <sup>c</sup> cartridges | 20                                    | GC-MS                         | Sci. Total Environ. 396 (2008) 79          |
| Estrone and derivatives                                                                 | Oasis <sup>®</sup> HLB<br>(-)                      | $\mu$ SPE <sup>c</sup> disks      | 1.37                                  | GC-MS                         | Sci. Total Environ. 590 (2017) 832         |
| Progesterone                                                                            | Poly(THF) <sup>e</sup><br>(-)                      | FPSE <sup>f</sup>                 | 60                                    | HPLC-MS/MS                    | J. Chromatogr. A 1437 (2016) 116           |
| Carbamazepine, atrazine, progesterone, estrone & triclosan                              | MIL-53(Al)<br>(5 mg)                               | D- $\mu$ SPE <sup>h</sup>         | 13 – 21                               | HPLC-DAD                      | Talanta 179 (2018) 775 [19]                |
| 8 PAHs                                                                                  | Fe <sub>3</sub> O <sub>4</sub> /HKUST-1<br>(25 mg) | M-D- $\mu$ SPE <sup>i</sup>       | 2.7 – 15                              | UHPLC-FD                      | J. Chromatogr. A 1436 (2016) 42 [10]       |
| 16 PAHs                                                                                 | CIM-80<br>(20 mg)                                  | D- $\mu$ SPE <sup>h</sup>         | 0.75 – 9.3                            | UHPLC-FD                      | Present work                               |
| Carbamazepine, atrazine, progesterone, methylparaben, benzophenone, estrone & triclosan | CIM-80<br>(20 mg)                                  | D- $\mu$ SPE <sup>h</sup>         | 0.090 – 21<br>$\mu$ g·L <sup>-1</sup> | UHPLC-UV                      | Present work                               |

<sup>a</sup>N-vinylpyrrolidone polymer<sup>b</sup>bar-adsorptive microextraction<sup>c</sup>miniaturized solid-phase extraction<sup>d</sup>multiwalled carbon nanotubes<sup>e</sup>sol-gel poly(tetrahydrofuran)<sup>f</sup>fabric-phase sorptive extraction<sup>g</sup>Quick, Easy, Cheap, Effective, Rugged, and Safe dispersive extraction method<sup>h</sup>dispersive miniaturized solid-phase extraction<sup>i</sup>magnetic-based dispersive miniaturized solid-phase extraction
